# Supplementary material for: Site-specific PEGylation of proteins by a Staudinger-phosphite reaction
Source: Royal Society of Chemistry journal article supplement (doi:10.1039/c0sc00324g), 2010-01-01
Supplement: c0sc00324g.pdf [file c0sc00324g.pdf]

# Electronic Supplementary Information

## Site-Specific PEGylation of Proteins by a Staudinger-Phosphite Reaction

**Remigiusz Serwa,<sup>a</sup> Paul Majkut,<sup>a</sup> Benjamin Horstmann,<sup>a</sup> Jean-Marie Swiecicki,<sup>a</sup> Michael Gerrits,<sup>b</sup>  
Eberhard Krause,<sup>c</sup> and Christian P. R. Hackenberger<sup>\*a</sup>**

<sup>a</sup> Department of Chemistry and Biochemistry, Free University Berlin, Takustrasse 3, 14195 Berlin, Germany

<sup>b</sup> RiNA GmbH, Takustrasse 3, 14195 Berlin, Germany

<sup>c</sup> Leibniz Institute of Molecular Pharmacology, Robert Rössle Strasse 10, 13125 Berlin, Germany

\* hackenbe@chemie.fu-berlin.de

|                                                                                                                          |    |
|--------------------------------------------------------------------------------------------------------------------------|----|
| General methods.....                                                                                                     | S2 |
| Synthesis of tris(2,5,8,11-tetraoxatridecan-13-yl) phosphite ( <b>4</b> ).....                                           | S2 |
| Synthesis of tris(4-(2,5,8,11-tetraoxatridecan-13-yloxy)-5-methoxy-2-nitrobenzyl) phosphite ( <b>11</b> ).....           | S2 |
| Synthesis of 4-methoxy-5-(polyethylene glycol methyl ether)-2-nitrobenzyl alcohol precursor to phosphite <b>14</b> ..... | S3 |
| Synthesis of tris(4-methoxy-5-(polyethylene glycol methyl ether)-2-nitrobenzyl) phosphite ( <b>14</b> ).....             | S3 |
| Synthesis of tris(polyethylene glycol methyl ether) phosphite ( <b>15</b> ).....                                         | S4 |
| NMR studies on stability of phosphites <b>2</b> , <b>4</b> , and <b>9</b> .....                                          | S4 |
| Water solubility of phosphites <b>9</b> and <b>11</b> .....                                                              | S5 |
| Consumption of peptide <b>1</b> in the presence of phosphites <b>9</b> and <b>11</b> .....                               | S5 |
| Amino acid sequence of model proteins <b>6</b> and <b>8</b> (SecB from <i>E.coli</i> ).....                              | S6 |
| Mass spectrum of the protein mixture obtained upon incubation of <b>6</b> with phosphite <b>4</b> .....                  | S6 |
| The influence of GdnCl and DMSO on the PEGylation of protein <b>6</b> in the presence phosphite <b>15</b> .....          | S6 |
| References.....                                                                                                          | S7 |

**General Methods.**  $\alpha$ -Methoxy- $\omega$ -hydroxy poly(ethylene glycol), mPEG, (Mw 750 Da) was purchased from Iris Biotech, whereas all other reagents and solvents were purchased from Sigma Aldrich or Acros Organics. Phosphite **9** was prepared according to a previous report.<sup>1</sup> C-18 Sep-Pak cartridges were purchased from Waters, whereas C-18 Zip Tips were purchased from Millipore. HRMS (ESI-TOF) was performed on an Agilent 6210 system, Agilent Technologies (Santa Clara, CA). Spray voltage was set to 4 kV, and drying gas flow rate was set to 25 psi. Mass spectrometry of protein **7** was performed using an MALDI-TOF instrument (AB SCIEX TOF/TOF 5800, Applied Biosystems Deutschland GmbH, Darmstadt, Germany) equipped with an Nd:YAG laser (355 nm). Samples were prepared with alpha-cyano-4-hydroxycinnamic acid matrix and measured in the linear mode. The spectrum obtained was the mean of 5000 laser shots. GPC was performed in THF on a LC-RI Agilent 1100 system, Agilent Technologies (Santa Clara, CA), equipped with 3 PLgel 5 $\mu$ m MIXED-C Gel columns, Varian (Lake Forest, CA). The instrument was calibrated with a polystyrene standard mixture (Mp=474, Mp=3250, Mp=8400, Mp=17600, Mp=66000). Melting point was measured on a BÜCHI 510 instrument from BÜCHI Labortechnik (Essen, Germany). <sup>1</sup>H-NMR, <sup>13</sup>C-NMR, and <sup>31</sup>P-NMR spectra were recorded at a Jeol ECX/400, a Bruker 500 AMC, or a Bruker AMC 700 in CDCl<sub>3</sub>, CD<sub>3</sub>CN, or in 1M Tris buffer. The chemical shifts were reported in ppm relatively to the residual solvent peak.

**Synthesis of tris(2,5,8,11-tetraoxatridecan-13-yl) phosphite (4).**

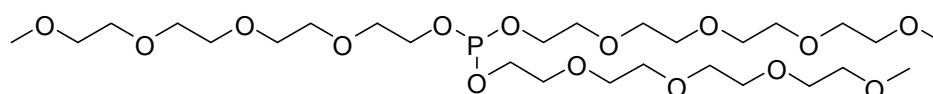

This compound was obtained as colorless oil (96%) according to the procedure applied for the preparation of tri(4-pentenyl) phosphite.<sup>2</sup> <sup>1</sup>H NMR (400 MHz, [D<sub>3</sub>]CH<sub>3</sub>CN):  $\delta$ =3.89-3.83 (m, 6H), 3.56-3.48 (m, 36H), 3.46-3.44 (m, 6H), 3.27 ppm (s, 9H); <sup>13</sup>C NMR (101 MHz, [D<sub>3</sub>]CH<sub>3</sub>CN)  $\delta$ =73.3, 72.49, 72.47, 71.6, 71.5, 71.07, 71.05, 71.03, 71.00, 70.93, 70.87, 70.86, 62.3, 62.2, 61.8, 58.8; <sup>31</sup>P NMR (100 MHz, [D<sub>3</sub>]CH<sub>3</sub>CN):  $\delta$ =140.6 ppm (s); HRMS (ESI-TOF):  $m/z$ : 691.3303 [M+O+Na]<sup>+</sup> (calcd.:  $m/z$ : 691.3276).

**Synthesis of tris(4-(2,5,8,11-tetraoxatridecan-13-yloxy)-5-methoxy-2-nitrobenzyl) phosphite (11).**

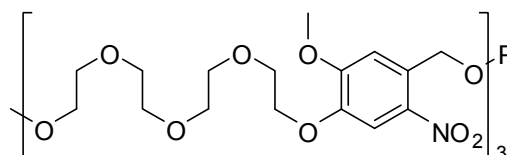

This compound was obtained as pale yellow oil (37% over 3 steps) from 4-(hydroxymethyl)-2-methoxy-5-nitrophenol according to the procedure applied for the preparation of its homologue, tris(4-(2,5,8,11,14-pentaoxahexadecan-16-yloxy)-5-methoxy-2-nitrobenzyl) phosphite.<sup>1</sup> <sup>1</sup>H NMR (400 MHz, [D<sub>3</sub>]CH<sub>3</sub>CN): δ=7.65 (s, 3H), 7.22 (s, 3H), 5.31 (d, *J*=7.5 Hz, 6H), 4.17-4.15 (m, 6H), 3.86 (s, 9H), 3.82-3.79 (m, 6H), 3.64-3.62 (m, 6H), 3.58-3.56 (m, 6H), 3.56-3.50 (m, 18H), 3.45-3.43 (m, 6H), 3.27 ppm (s, 9H); <sup>13</sup>C NMR (62.5 MHz, [D<sub>3</sub>]CH<sub>3</sub>CN): δ=155.4, 148.7, 140.6, 130.8, 130.7, 111.8, 110.8, 73.1, 71.9, 71.7, 71.63, 71.62, 71.5, 70.5, 70.3, 63.1, 63.0, 59.4, 57.4 ppm; <sup>31</sup>P NMR (100 MHz, [D<sub>3</sub>]CH<sub>3</sub>CN): δ=139.0 ppm (s); HRMS: *m/z*: 1196.4686 [M+H]<sup>+</sup> (calcd.: *m/z*: 1196.4633).

**Synthesis of 4-methoxy-5-poly(ethylene glycol) methyl ether-2-nitrobenzyl alcohol [PEG Mw 750 Da] precursor to phosphite 14.**

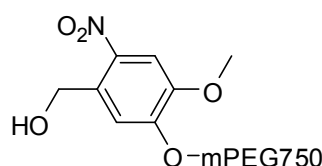

This compound was prepared as pale yellow, low melting solid (29% over 2 steps) from α-methoxy-ω-hydroxy poly(ethylene glycol) [PEG-Mw 750 Da] according to the procedure applied for the preparation of its homologue, 4-(2,5,8,11,14-pentaoxahexadecan-16-yloxy)-5-methoxy-2-nitrobenzyl alcohol.<sup>1</sup> <sup>1</sup>H NMR (400 MHz, [D]CHCl<sub>3</sub>): δ=7.78 (s, 1H), 7.21 (s, 1H), 4.96 (d, *J*=3.8 Hz, 2H), 4.26-4.24 (m, 2H), 3.98 (s, 3H), 3.92-3.90 (m, 2H), 3.73-3.71 (m, 2H), 3.68-3.66 (m, 2H), 3.65-3.59 (m, OCH<sub>2</sub>), 3.55-3.53 (m, 2H), 3.37 (s, 3H); <sup>13</sup>C NMR (62.5 MHz, [D<sub>3</sub>]CH<sub>3</sub>CN): δ=155.1, 147.6, 139.9, 134.8, 110.9, 110.3; 72.5, 71.3, 71.1, 71.0, 70.9, 70.0, 69.7, 61.8, 58.8, 56.9.

**Synthesis of tris[4-methoxy-5-poly(ethylene glycol) methyl ether-2-nitrobenzyl] phosphite [PEG Mw 750 Da] (14).**

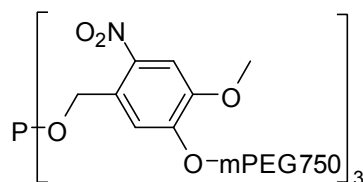

To a solution of 4-methoxy-5-poly(ethylene glycol) methyl ether-2-nitrobenzyl alcohol [PEG Mw 750 Da] (165 mg, 171 μmol) in toluene (0.3 mL) was added a solution of tris(dimethylamino)phosphine in toluene (100 μL; 0.57 M), and the mixture was heated at 90 °C for 2 h. Toluene was evaporated under reduced pressure and the residue was purified by C-18 Sep-Pak with a gradient of 0-50% MeCN in water. Upon removal of solvents, phosphate **14** was obtained as pale yellow, low melting solid (93 mg,

56%).  $^1\text{H}$  NMR (400 MHz,  $[\text{D}_3]\text{CH}_3\text{CN}$ ):  $\delta$ =7.67 (s, 3H), 7.24 (s, 3H), 5.33 (d,  $J$ =7.6 Hz, 6H), 4.19-4.17 (m, 6H), 3.88 (s, 9H), 3.83-3.81 (m, 6H), 3.66-3.64 (m, 6H), 3.61-3.59 (m, 6H), 3.57-3.52 (m,  $\text{OCH}_2$ ), 3.47-3.45 (m, 6H), 3.30 (s, 9H);  $^{13}\text{C}$  NMR (62.5 MHz,  $[\text{D}_3]\text{CH}_3\text{CN}$ ):  $\delta$ =155.0, 147.5, 139.9, 134.8, 110.8, 110.3, 72.5, 71.3, 71.1, 71.0, 70.9, 70.0, 69.6, 61.8, 58.8, 56.9;  $^{31}\text{P}$  NMR (100 MHz,  $[\text{D}_3]\text{CH}_3\text{CN}$ ):  $\delta$ =139.8 (s); GPC: single peak ( $M_p$ =2927 Da, PDI=1.08).

### Synthesis of tris[poly(ethylene glycol) methyl ether] phosphite [PEG Mw 2000 Da] (**15**).

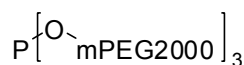

To a solution of mPEG [Mw 2000 Da] (50 mg, 25  $\mu\text{mol}$ ) in dry toluene (80  $\mu\text{L}$ ) was added a solution of tris(dimethylamino)phosphine in the same solvent (20  $\mu\text{L}$ ; 0.40 M), and the mixture was refluxed for 3 h. Toluene was removed and the residue was subjected to a GPC purification in THF, yielding phosphite **15** as a white solid (20 mg, 40%). M.P.=56-58  $^\circ\text{C}$ ;  $^1\text{H}$  NMR (400 MHz,  $[\text{D}_3]\text{CH}_3\text{CN}$ ):  $\delta$ =3.93-3.87 (m,  $\text{POCH}_2$ ), 3.66-3.44 (m,  $\text{OCH}_2$ ), 3.29 ppm (s,  $\text{OCH}_3$ );  $^{31}\text{P}$  NMR (100 MHz,  $[\text{D}_3]\text{CH}_3\text{CN}$ ):  $\delta$ =140.5 (s); GPC: single peak ( $M_p$ =6467 Da, PDI=1.04).

**NMR studies on the stability of phosphites.** Phosphites **2**, **4**, and **9** (20 mM) were dissolved in 1 M Tris buffer (pH 7.4, 7.8 and 8.2) containing trimethyl phosphate as an internal standard (20 mM), and the hydrolytic decay of phosphites at 25  $^\circ\text{C}$  was monitored by  $^{31}\text{P}$  NMR. The decomposition of **2** and **4** over time is presented in Figure 1. Phosphite **9** was stable for at least 48 h in all the buffers used.

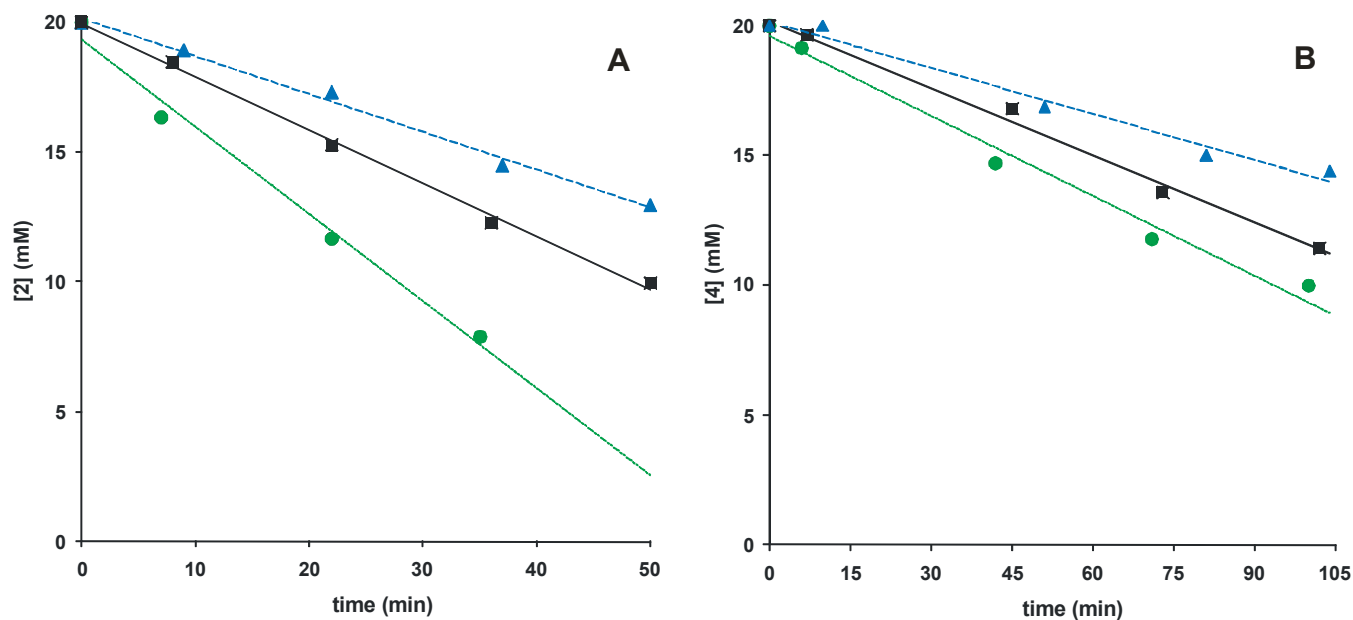

**Fig. 1.** The decomposition of 20 mM phosphite **2** (A) and 20 mM phosphite **4** (B) at 25  $^\circ\text{C}$  in 1 M tris buffer at pH 8.2 (triangles), pH 7.8 (squares), and pH 7.4 (circles).

**Water Solubility of phosphites 9 and 11.** Homologues **9** (13.3 mg, 10  $\mu$ mol) and **11** (12 mg, 10  $\mu$ mol) were mixed vigorously with water (10 mL) for 10 min in 15 mL Falcon tubes at RT, followed by centrifugation (4000 RPM, 5 min) and decantation. Supernatants were lyophilized, and precipitates (if any) were dried under vacuum. A precipitate was not observed upon centrifugation of phosphite **9**, therefore the procedure was repeated 3 times only for compound **11**. Dried fractions were weight out to quantify the solubility ( $1.53 \pm 0.03$  mM for **11**) and to ensure high sample recovery (>96%). Phosphite **9** (13.3 mg, 10  $\mu$ mol) was further mixed vigorously with smaller amounts of water (5 and 2 mL) for 10 min in 15 mL Falcon tubes at RT, followed by centrifugation (4000 RPM, 5 min) and decantation. Again, precipitate was not observed upon centrifugation suggesting water solubility of phosphite **9** to be greater than 50 mM.

**Consumption of peptide 1 in the presence of phosphites 9 and 11.** To a solution of azido-peptide **1** (50  $\mu$ M) in 1 M phosphate buffer pH 7.8 (1.0 mL) were added phosphites **9** (1.87-15.0 mM) and **11** (15 mM) and the mixture was incubated at 28  $^{\circ}$ C. When applicable, the reaction was conducted in 1:1 phosphate buffer pH 7.8/DMSO. Aliquots were withdrawn after 2, 4, 6, and 24 h, and they were immediately analyzed (injection volume: 50  $\mu$ L) by RP-HPLC connected in line to an ESI-TOF detector. Fractions of peptide **1** in the mixtures were calculated based on signal intensities of extracted ion current  $m/z=782.347 \pm 0.200$ , which correspond to  $[M+H]^+$ . A sample graphical representation of the data collected upon incubation of **1** in the presence of **9** (15 mM) or **11** (15 mM) in phosphate buffer is presented in Figure 2.

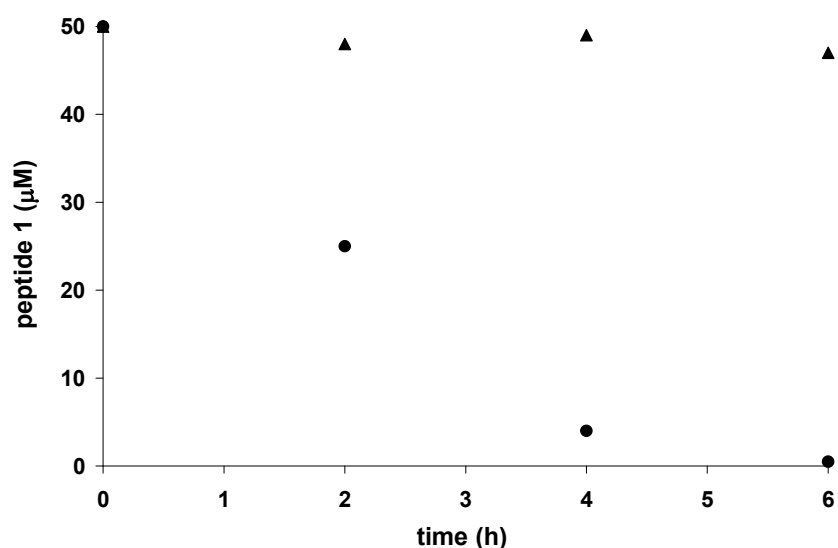

**Fig. 2** The disappearance of azido-peptide **1** (50  $\mu$ M) from buffered solutions contained 15 mM of phosphite **9** (circles) or phosphite **11** (triangles).

**Amino acid sequence of model proteins 6 and 8 (SecB from *E.coli*).**

MSEQNNTEMT FQIQRIYTKD ISFEAPNAPH VFQKDWQPEV KLDLDTASSQ LADDVYEVVL  
RVTVTASLGE ETAFLCEVQQ GGIFSIAGIE GTQMAHCLGA YCPNILFPYA RECITSMVSR  
GTFPQLNLAP VNFDALFMNY LQQQAGEGTE EHQDAXGHHH HHH; X = Phe(*p*-N<sub>3</sub>) for **6**, and  
X = Ser for **8**.

**Mass spectrum of the protein mixture obtained upon incubation of 6 with 4.** Upon the overnight incubation with phosphite **4**, SecB protein was purified with Ni-NTA magnetic beads followed by ZipTip C18 chromatography. A mixture of compounds **6** and **7** was observed by MALDI-MS, in which the phosphoramidate was the major component (Figure 3B). Identities of polypeptides were supported by MS data, which were obtained in good agreement with the calculated values (MALDI-MS for **6**:  $m/z=18341/18353$   $[M+H]^+$ , calcd.: 18347; for **7**:  $m/z=18806$   $[M+Na]^+$ , calcd.: 18803).

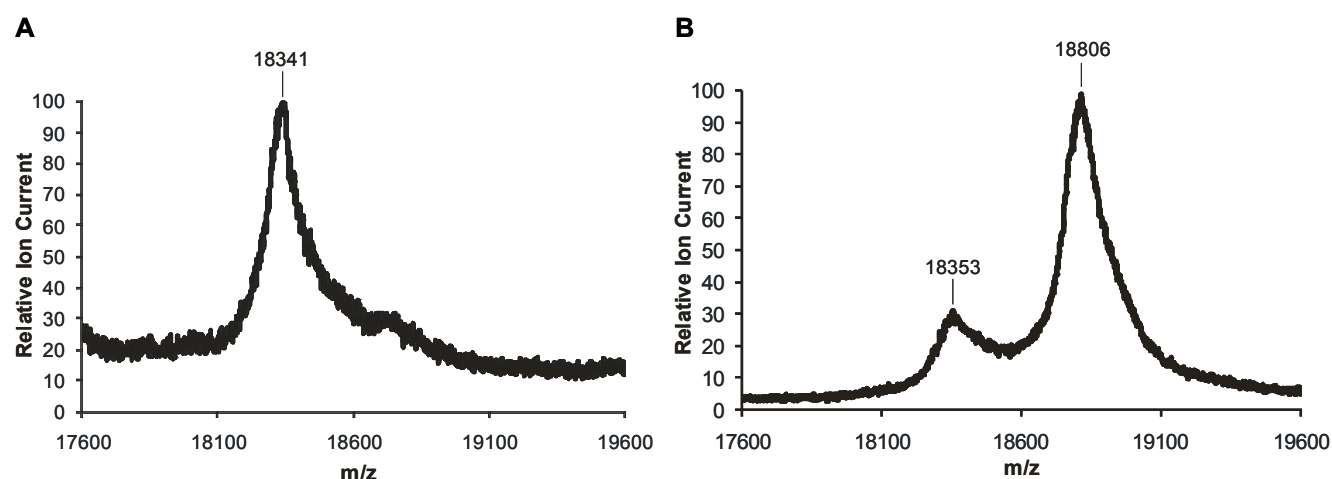

**Fig. 3** MALDI-MS spectra of unmodified protein **6** (A) and the mixture obtained upon overnight incubation of **6** with phosphite **4** (B).

**The influence of GdnCl and DMSO on the PEGylation of protein 6 in the presence of phosphite 15.** To a suspension of protein **6** (20  $\mu$ M) and phosphite **15** (0.39 mg, 65 nmol) in phosphate buffer pH 8.0 (10  $\mu$ L) was added, when applicable, DMSO (10  $\mu$ L), 6 M GdnCl in the buffer (10  $\mu$ L), or buffer (10  $\mu$ L); and the sample was shaken (2000 RPM) for 36 h at 28°C, during which time two extra portions of phosphite **15** (65 nmol each) were added. Following the incubation, the mixture was diluted with water (60  $\mu$ L) and 4 $\times$  sample loading buffer (20  $\mu$ L), and it was incubated at 35 °C (10 min) prior to loading it (30  $\mu$ L) on a 15% SDS-PAGE gel. Upon electrophoresis, the gel was stained with Coomassie Brilliant Blue (Figure 4).

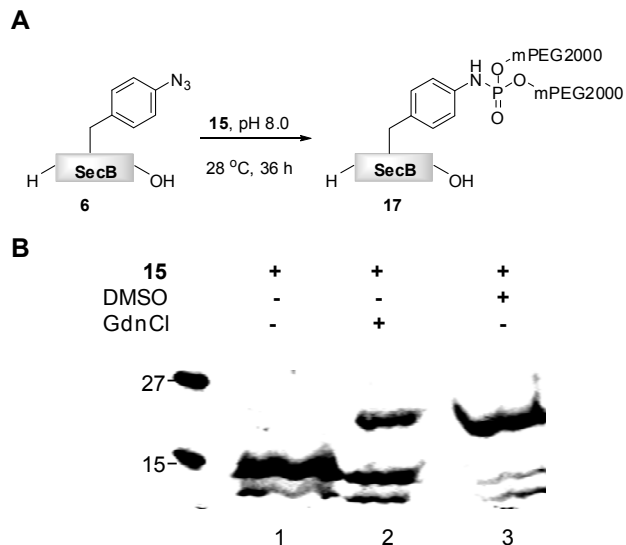

**Fig. 4** PEGylation of protein **6** (10  $\mu$ M) with phosphite **15** (3.3-10 mM) at 28  $^{\circ}$ C, in phosphate buffer pH 8.0 (Lane 1) in the presence of additives: 3 M GdnCl (Lane 2) and 50% DMSO (Lane 3); A. Reaction scheme; B. Coomassie stained SDS-PAGE gel.

## References

1. R. Serwa, I. Wilkening, G. Del Signore, M. Mühlberg, I. Claußnitzer, C. Weise, M. Gerrits, C. P. R. Hackenberger, *Angew. Chem. Int. Ed.* 2009, **48**, 8234-8239.
2. K. Skopek, J. A. Gladysz, *J. Organomet. Chem.* 2008, **693**, 857-866.
